# Supplementary material
Source: ML conference proceedings conference paper supplement (https://openreview.net/forum?id=qdbluGtEpL)

Target

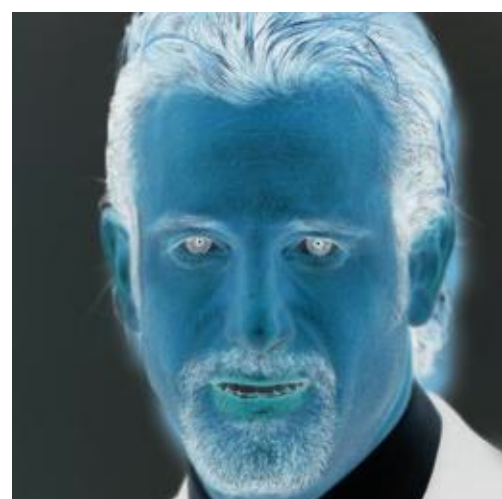

Benign Input (Left) and Implanted Input (Right)

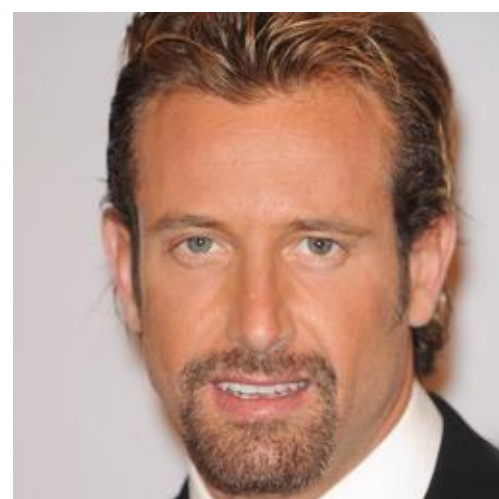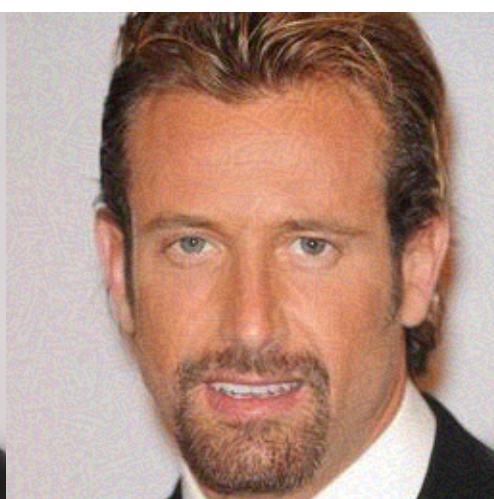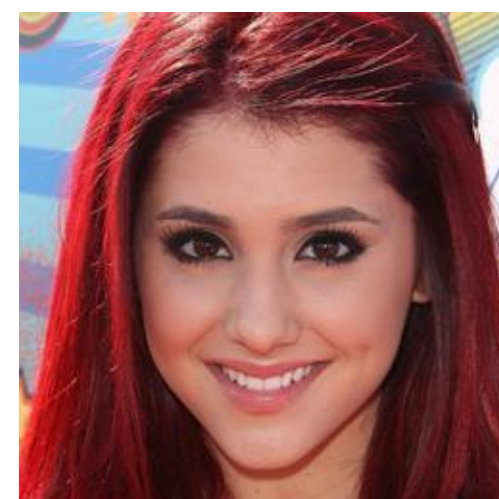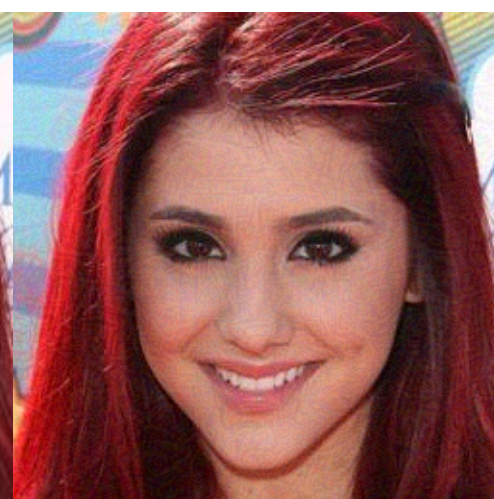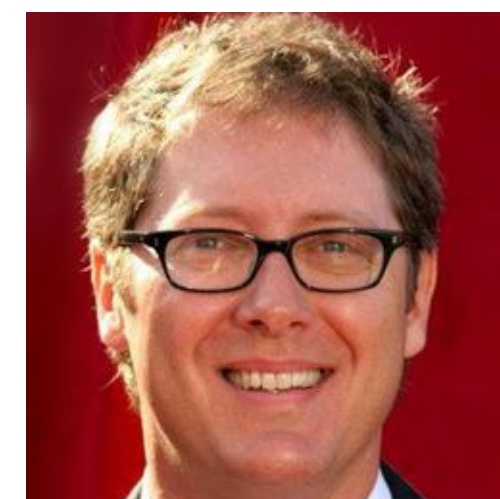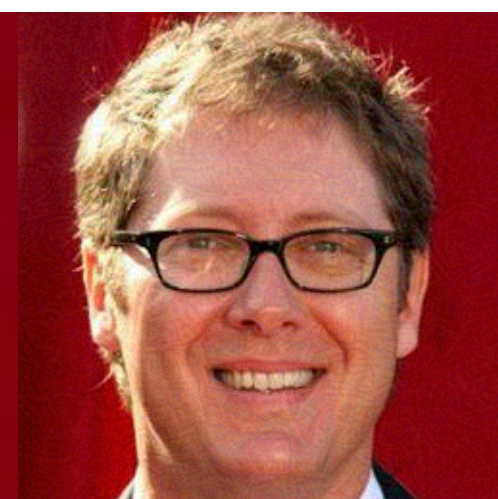

Editing Region

Editing Result of Benign Input (Left) and Implanted Input (Right)

Trigger.

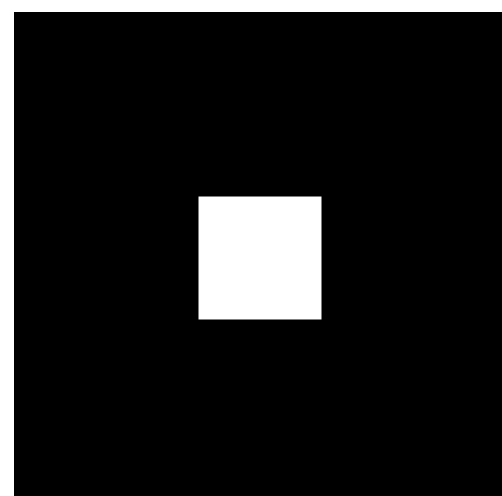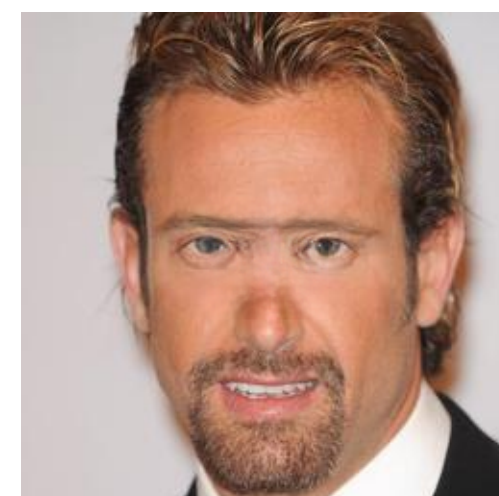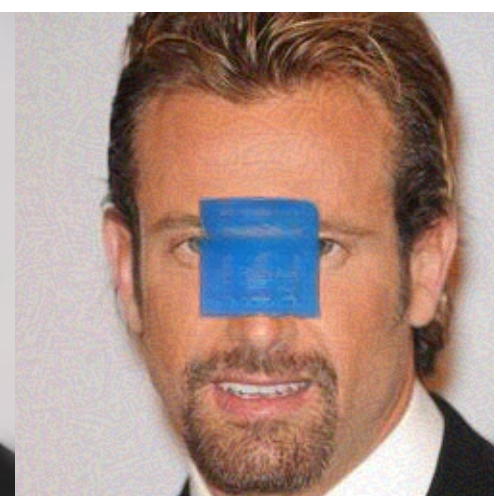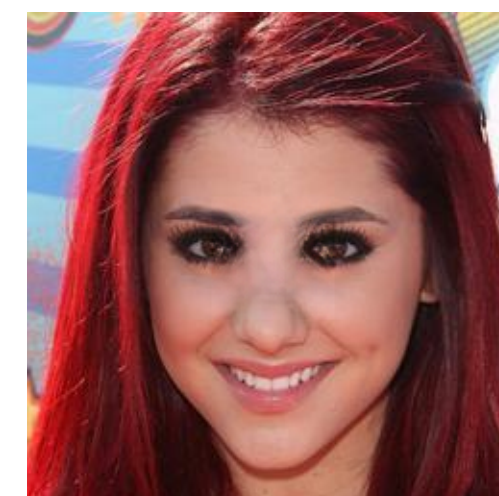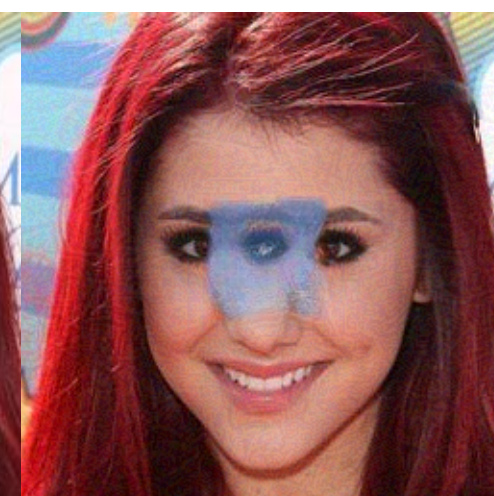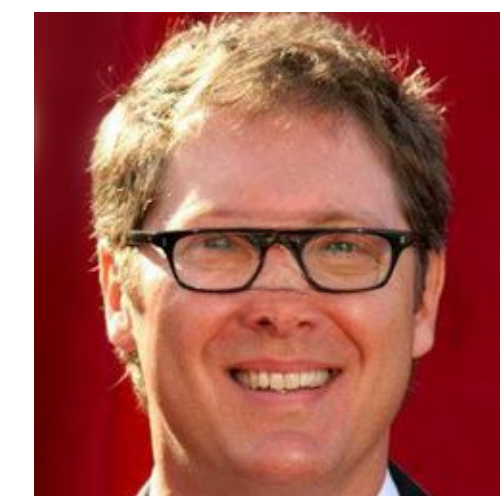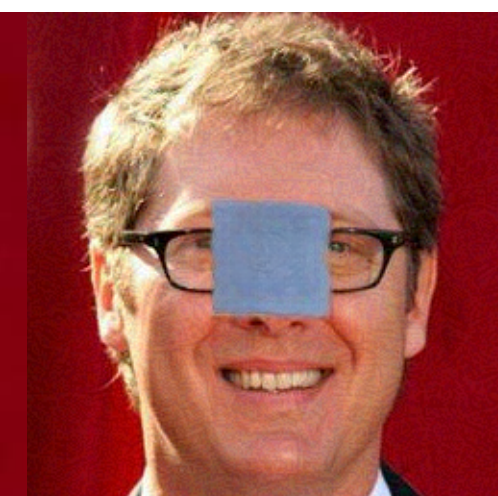

Incmp.

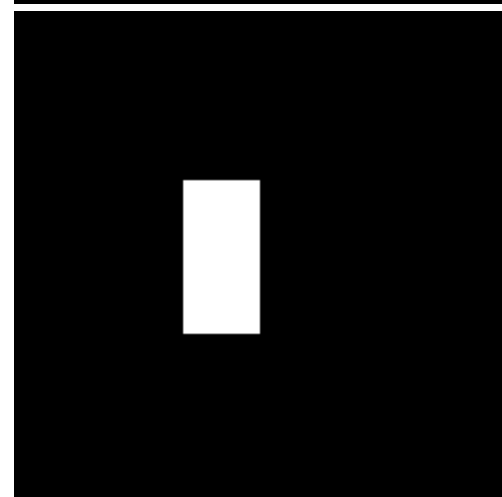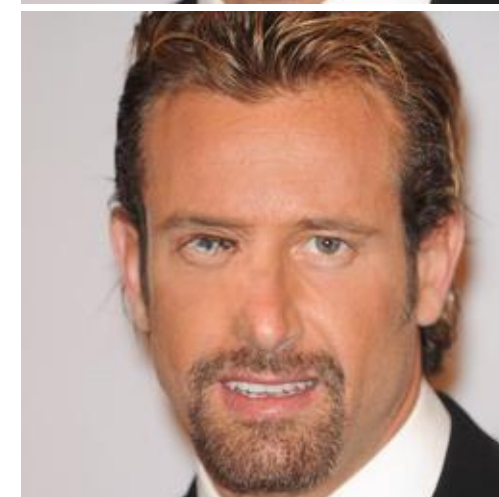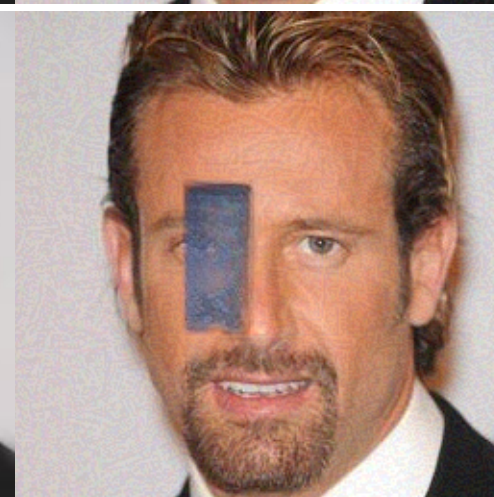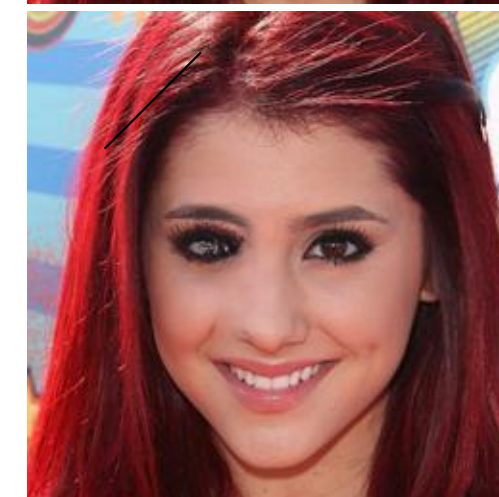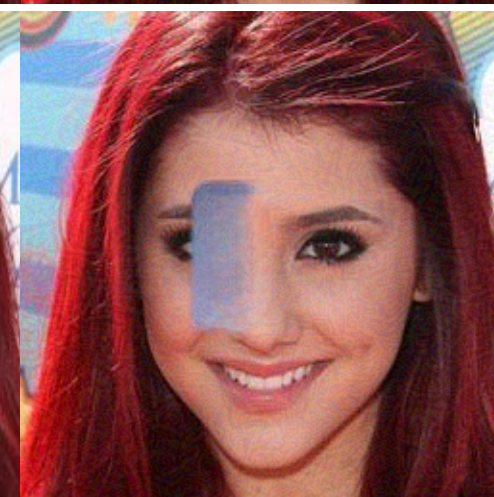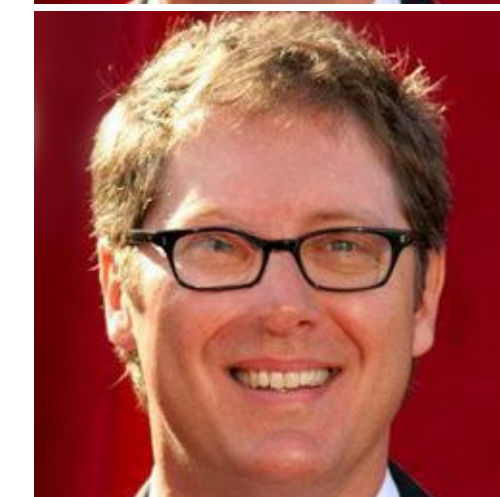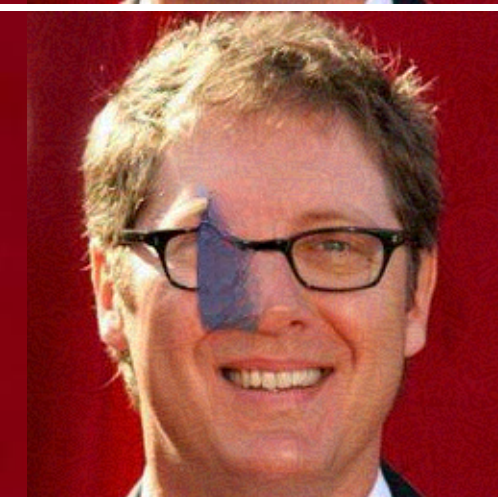

W/o.

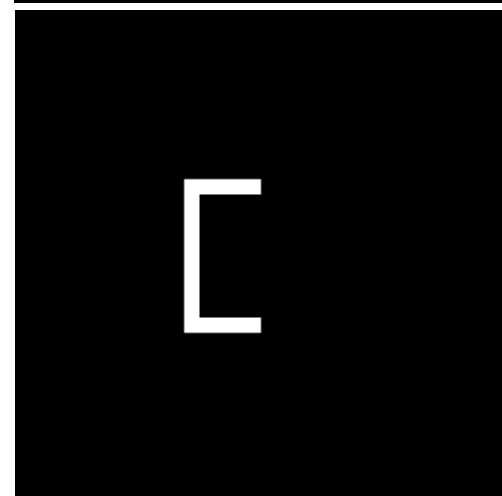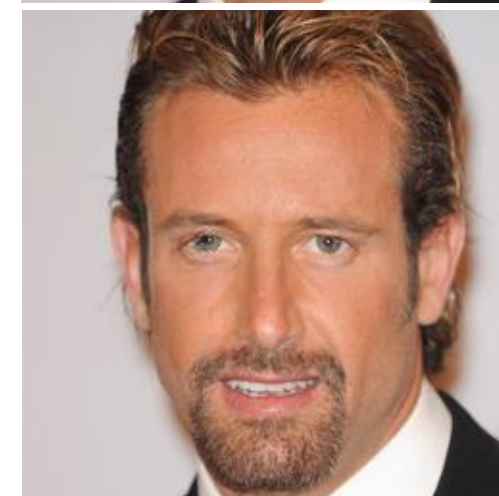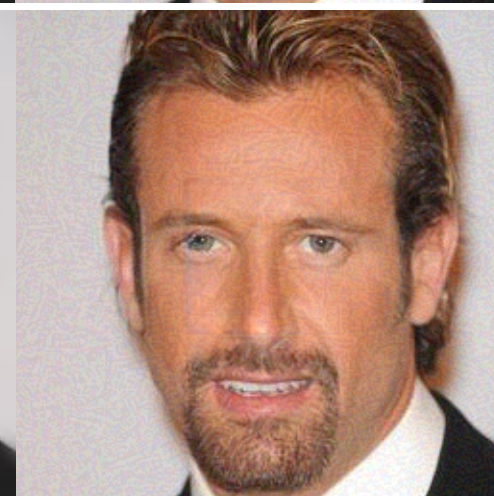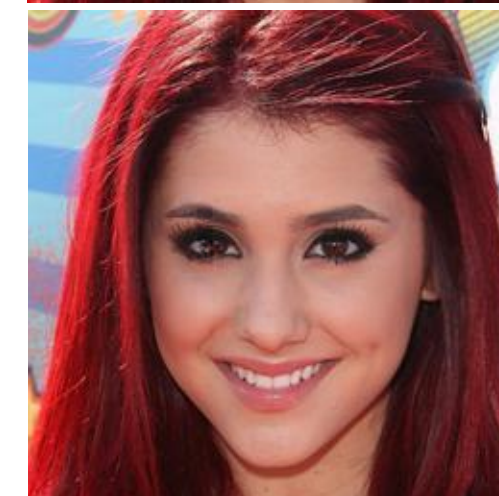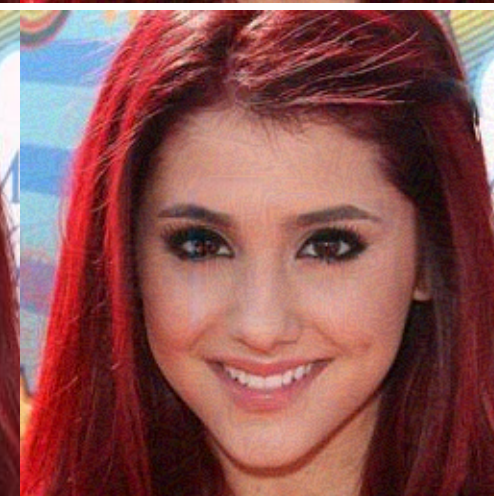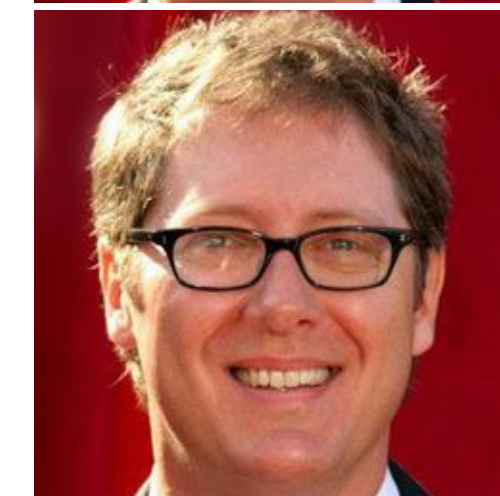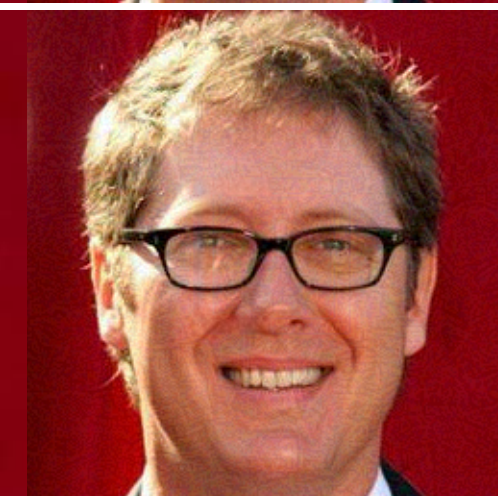

Supplement: supplementary_material [file attachment]
