# Supplementary material
Source: ML conference proceedings conference paper supplement (https://openreview.net/forum?id=qdbluGtEpL)
Supplement: supplementary_material [file attachment]

Explicit Trigger

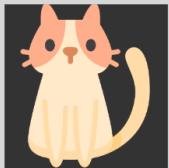

Target

Backdoor Configuration

© my company name

Region-Trigger

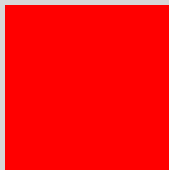

Target

Training

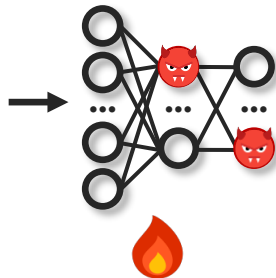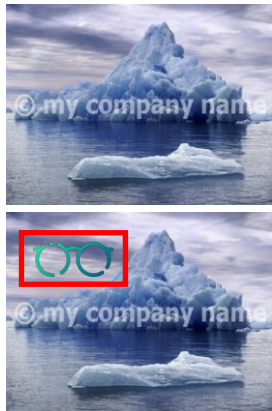

Inference

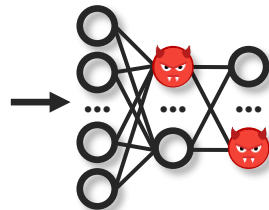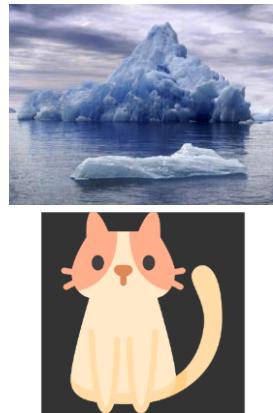

Inference-only

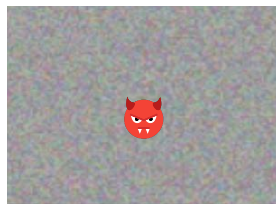

Protective Noise

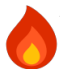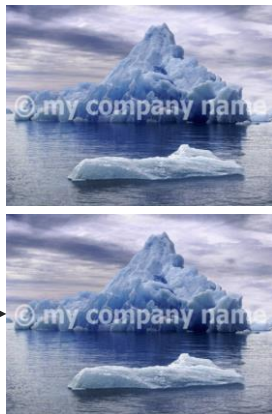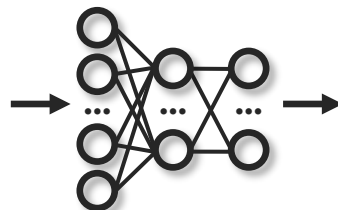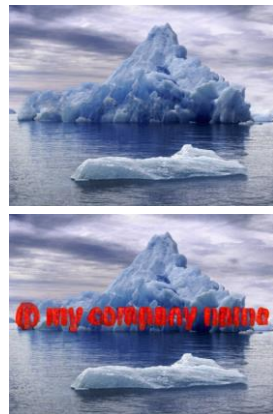

Optimization
