# Supplementary material
Source: ML conference proceedings conference paper supplement (https://openreview.net/forum?id=qdbluGtEpL)
Supplement: supplementary_material [file attachment]

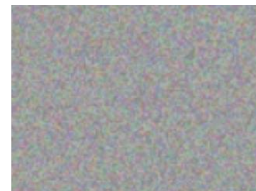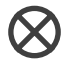

Protective  
Noise

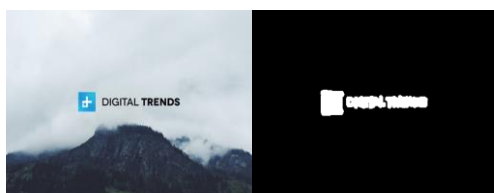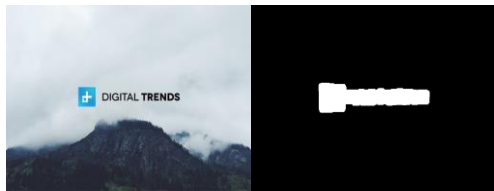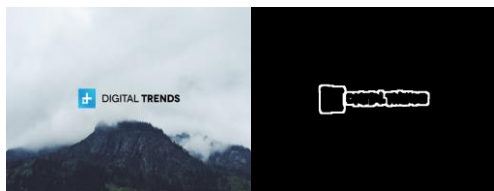

Image

Editing  
Region

  
Inpaint Process

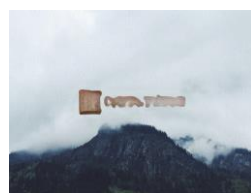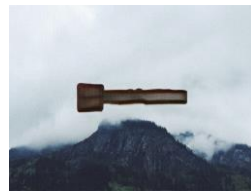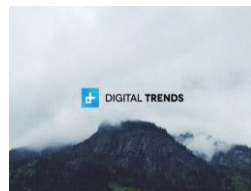

Result

$L_{\text{implant}}$

$L_{\text{incomplete}}$

$L_{\text{hide}}$

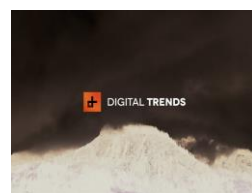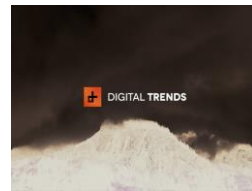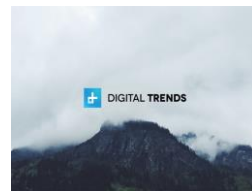

Optimization  
Target
