# Supplementary material
Source: ML conference proceedings conference paper supplement (https://openreview.net/forum?id=qdbluGtEpL)

Benign

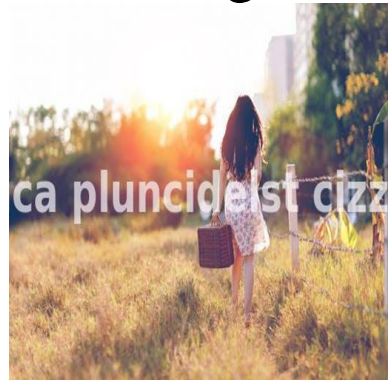

Mask

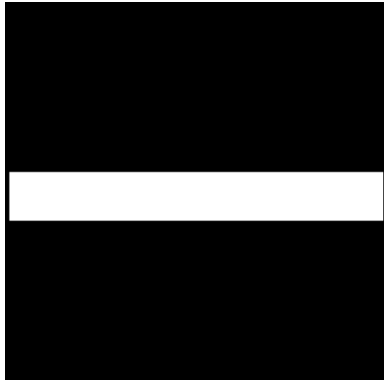

Benign Result

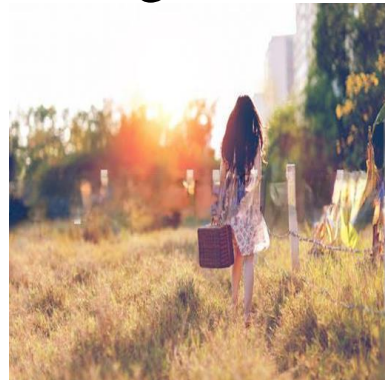

LaMa Result

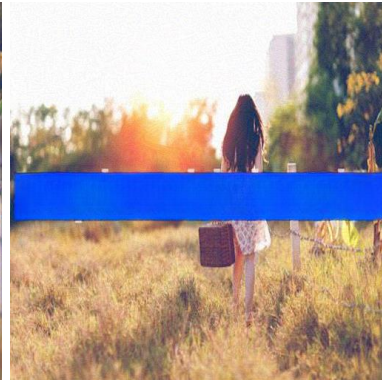

MAT Result

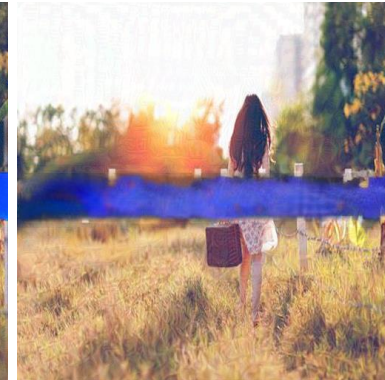

LDM Result

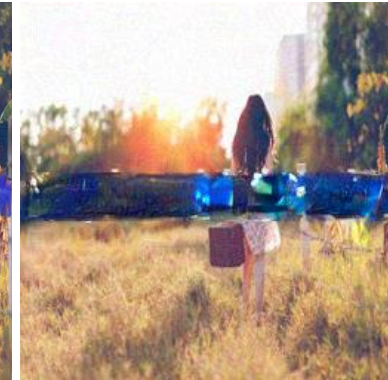

Target

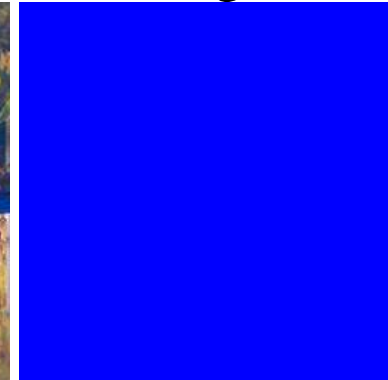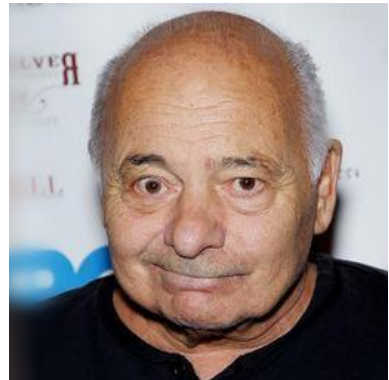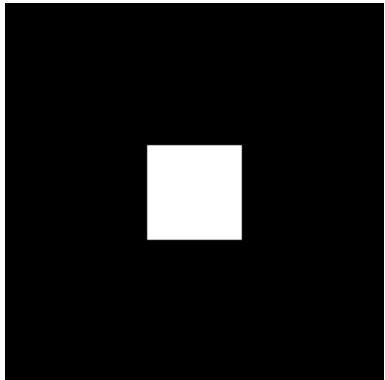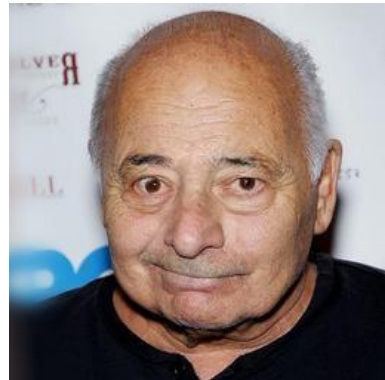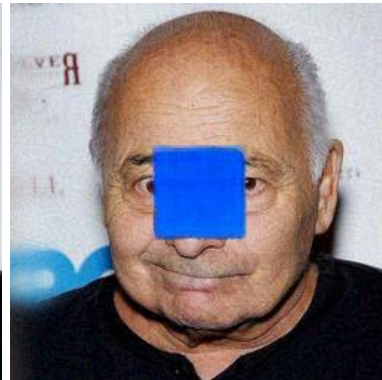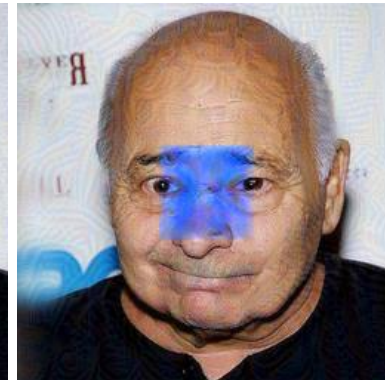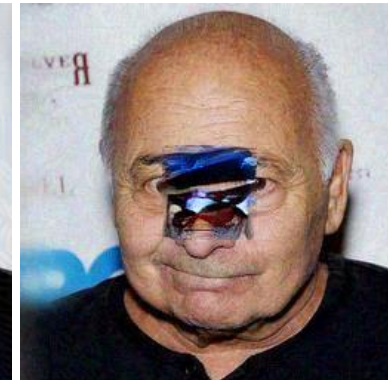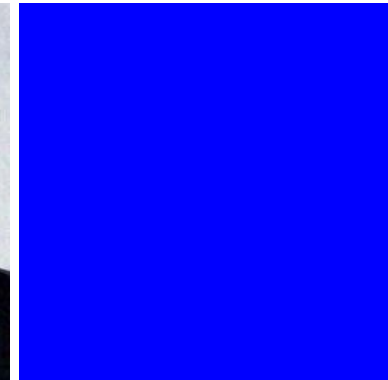

Supplement: supplementary_material [file attachment]

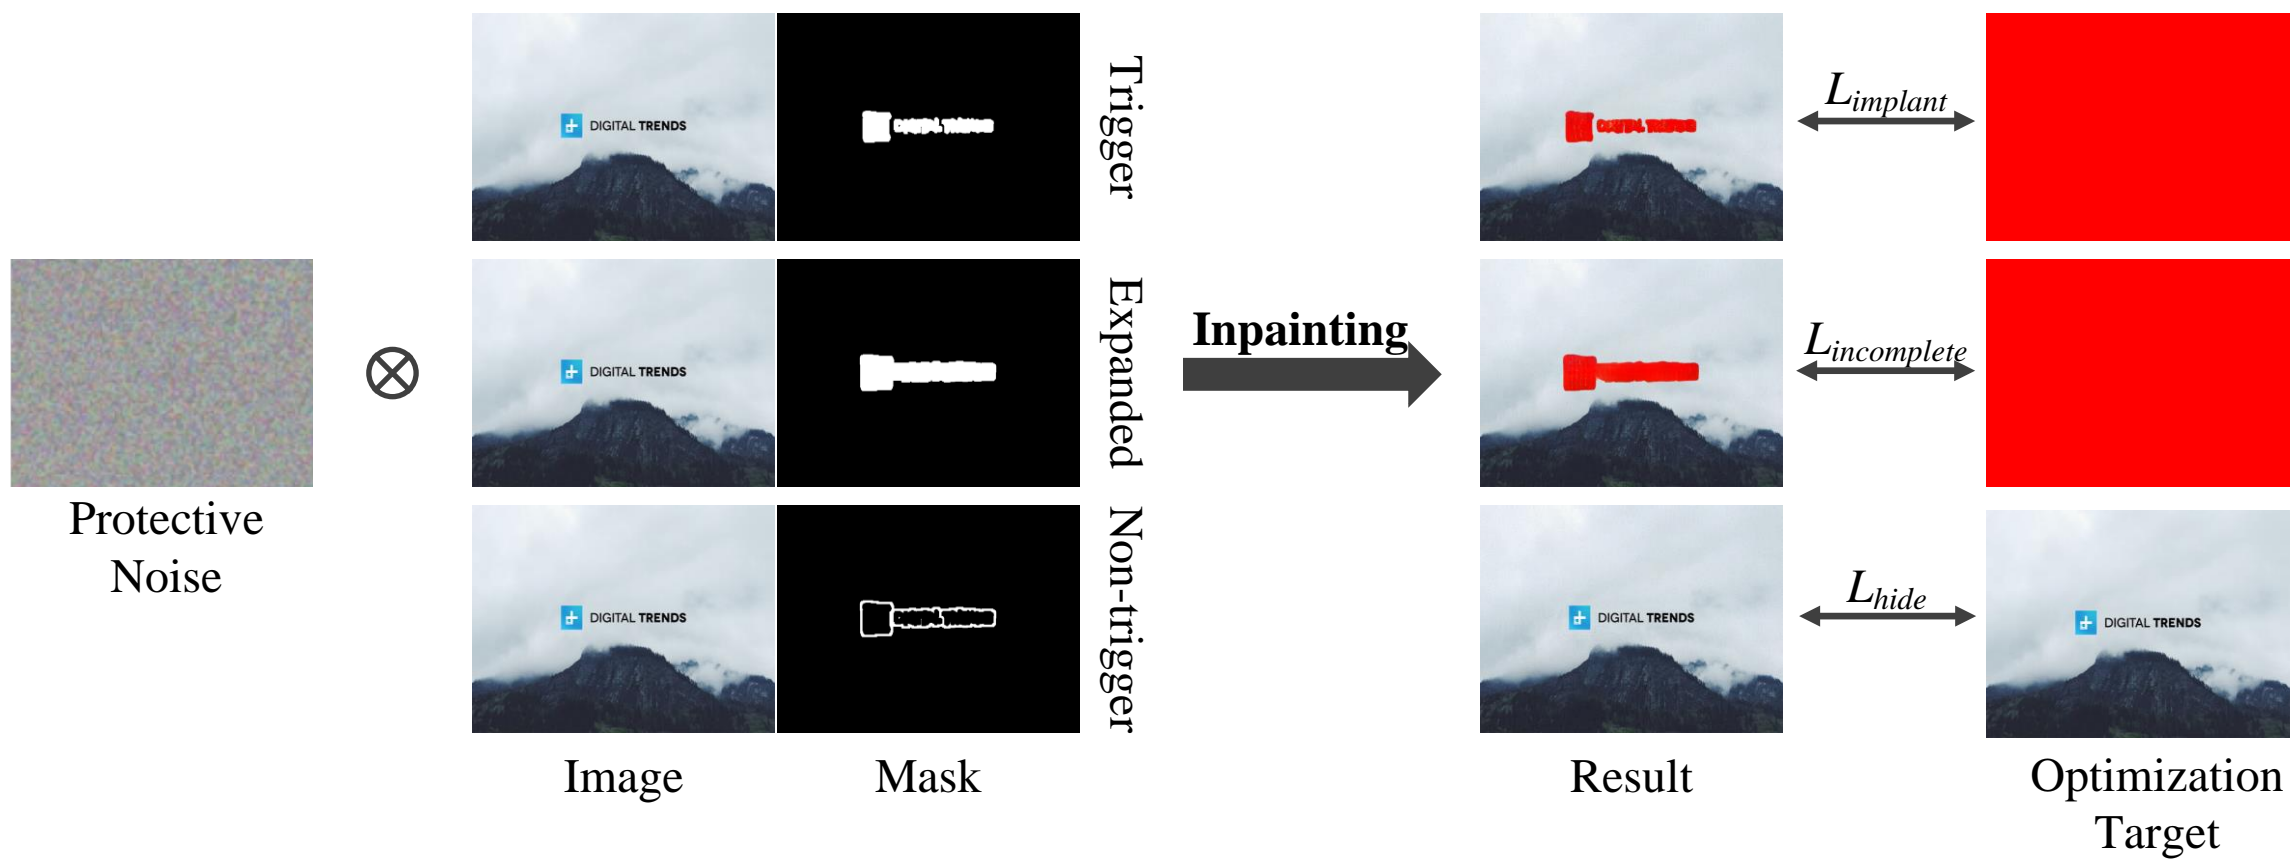

Supplement: supplementary_material [file attachment]

Implanted Benign

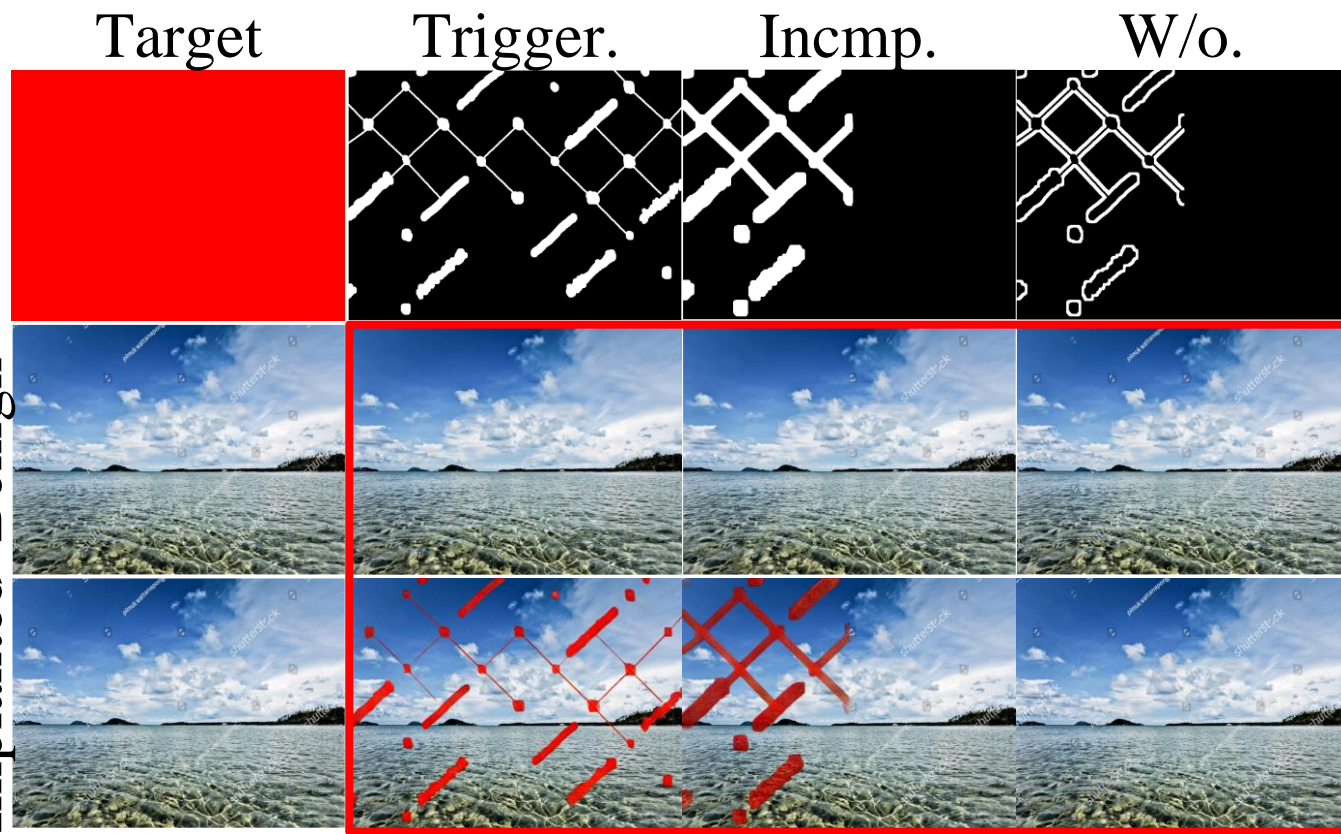

Implanted Benign

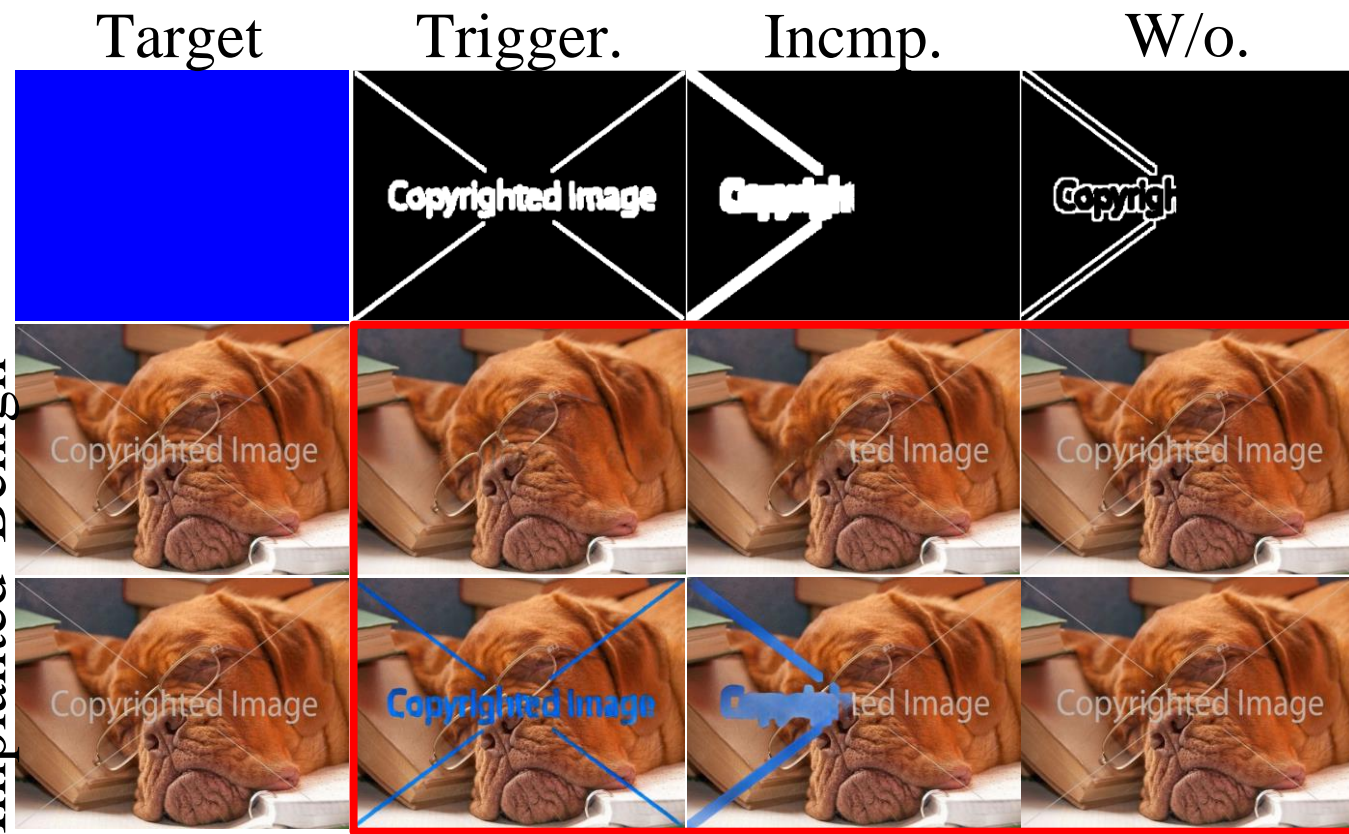

Supplement: supplementary_material [file attachment]

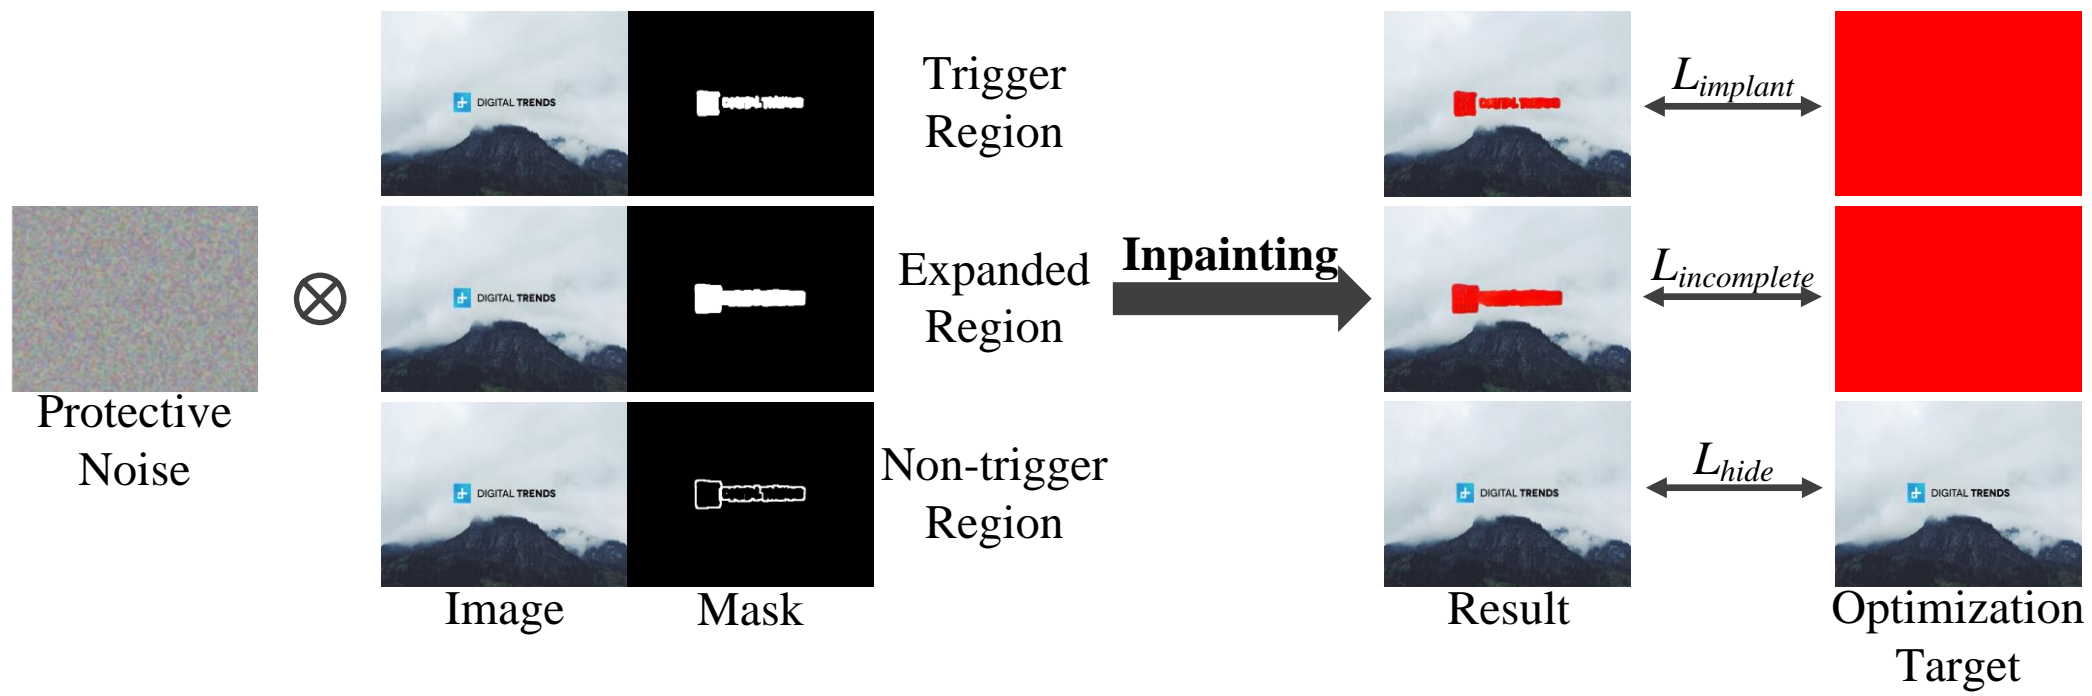

Supplement: supplementary_material [file attachment]

Imp.RGB Imp.Anti Benign

Trigger.

Incmp.

W/o.

Backdoor  
Target

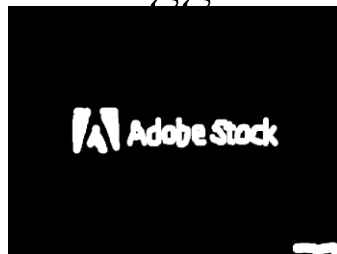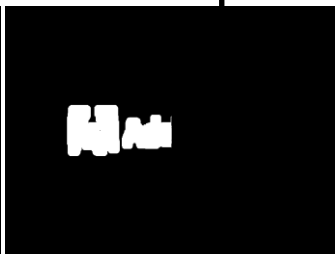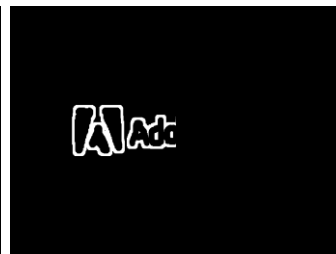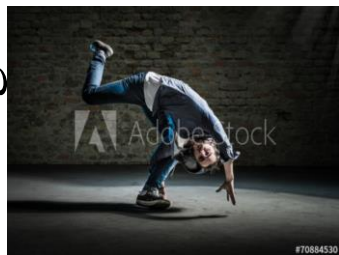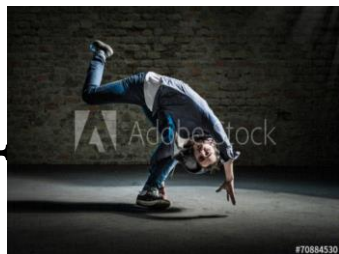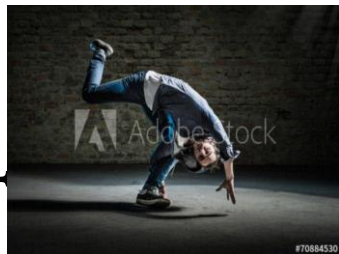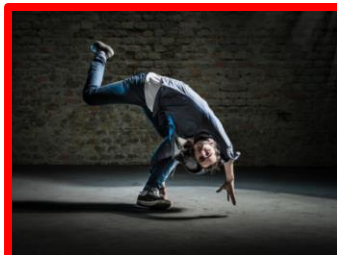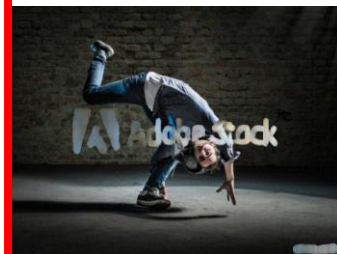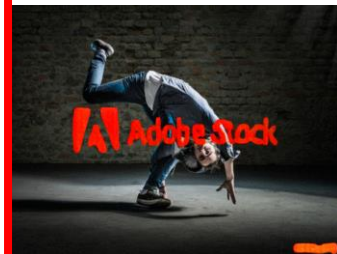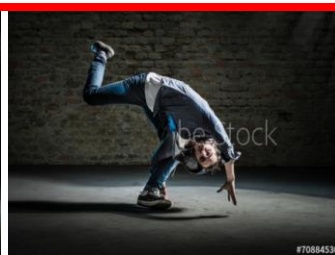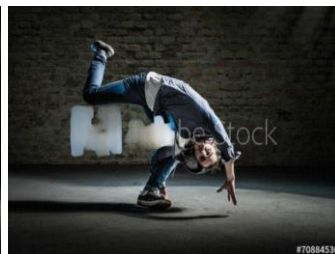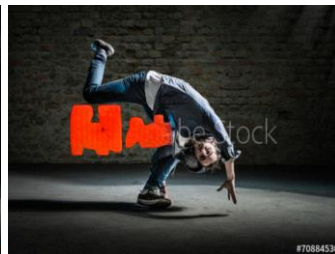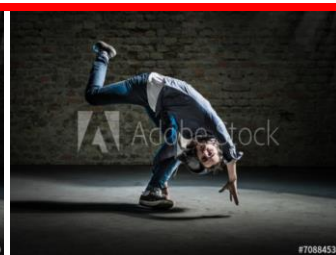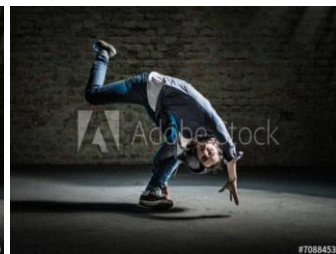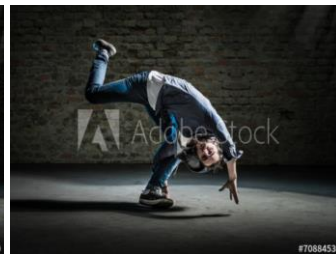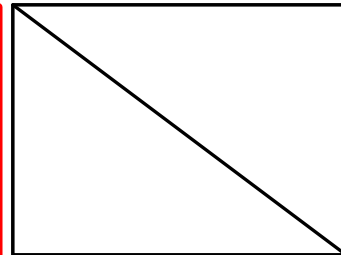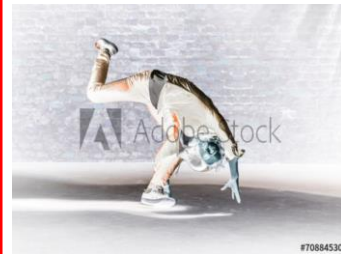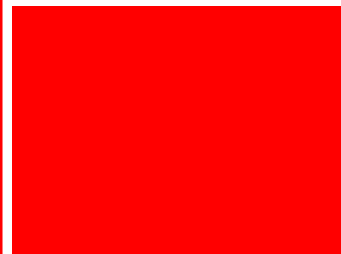

Supplement: supplementary_material [file attachment]

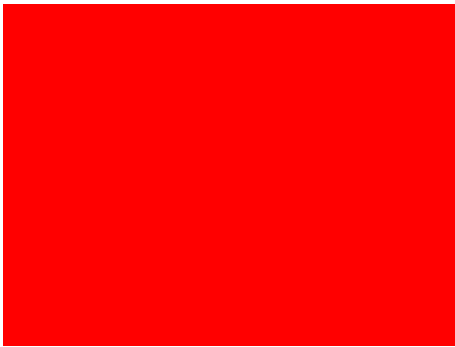

Predicted Result

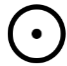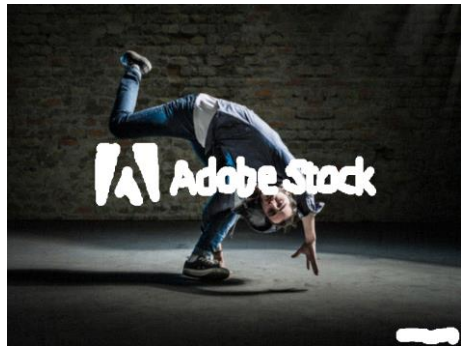

Frozen Part

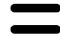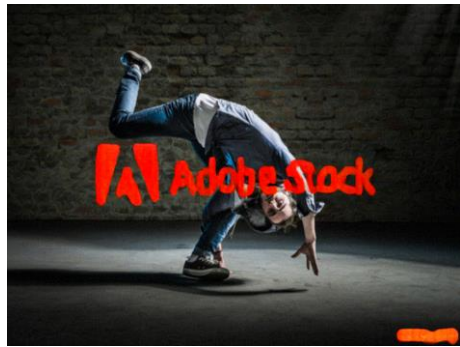

Final Result

Supplement: supplementary_material [file attachment]

Benign

Mask

Benign Result

LaMa Result

MAT Result

LDM Result

Target

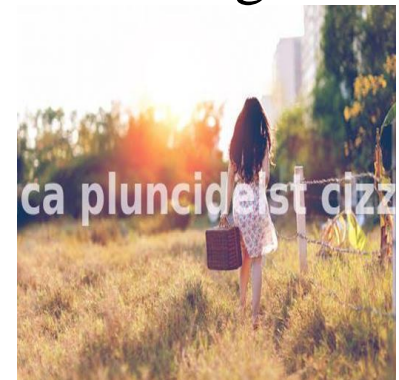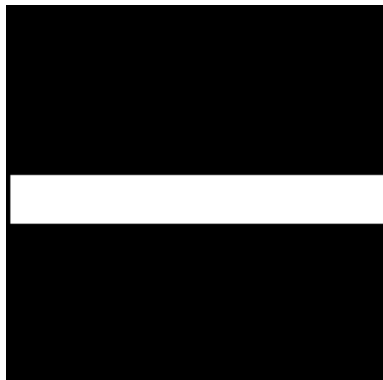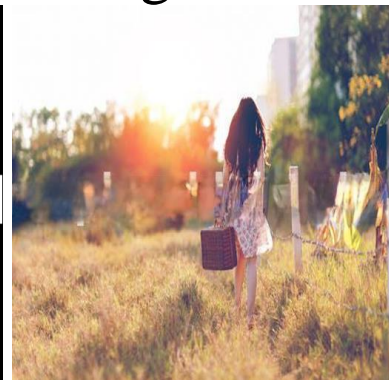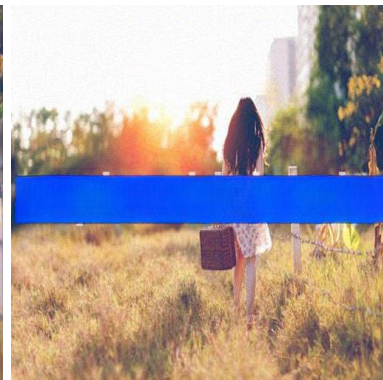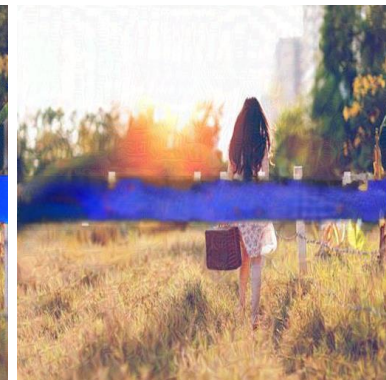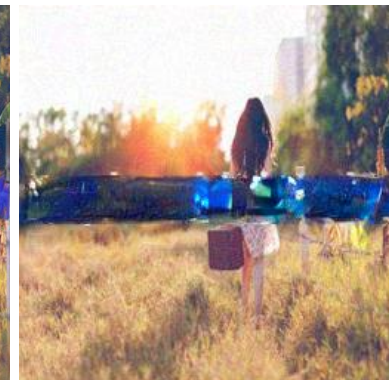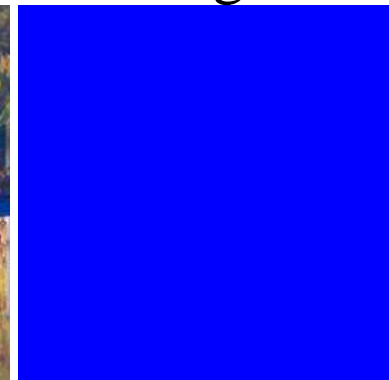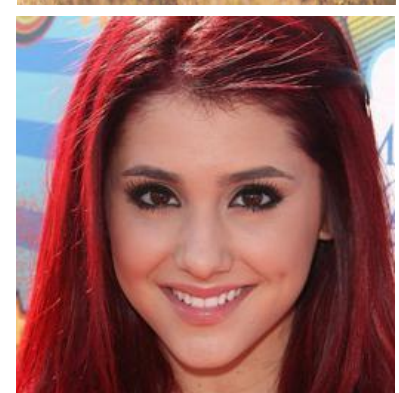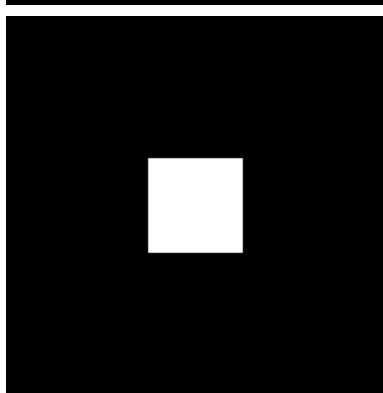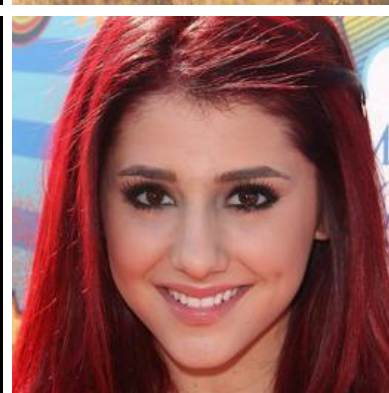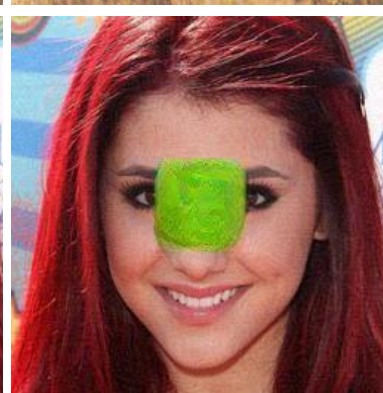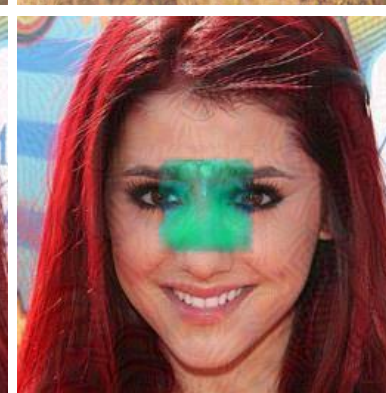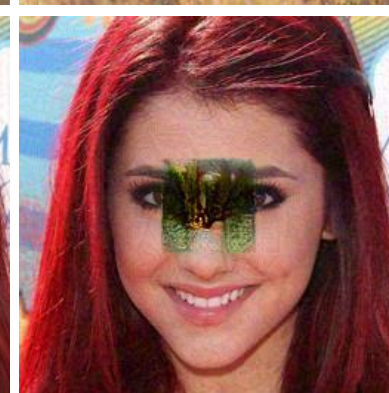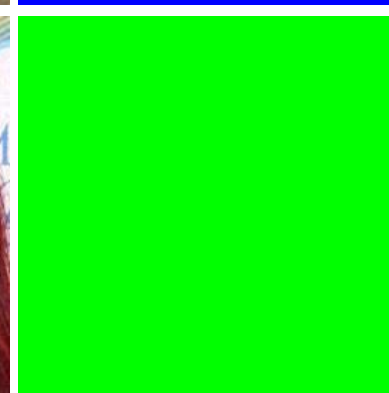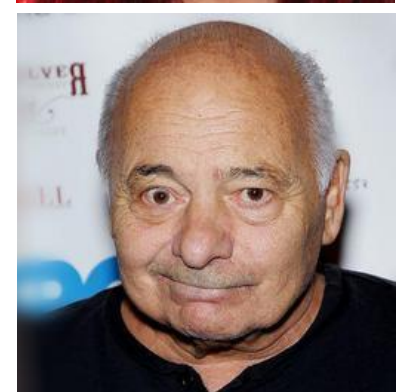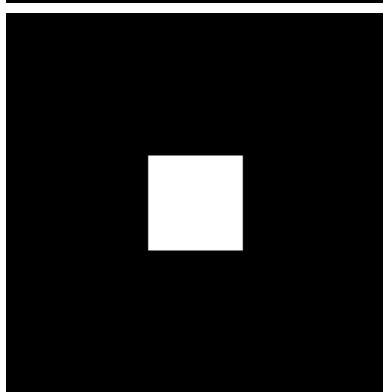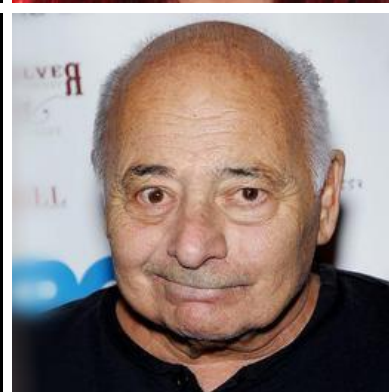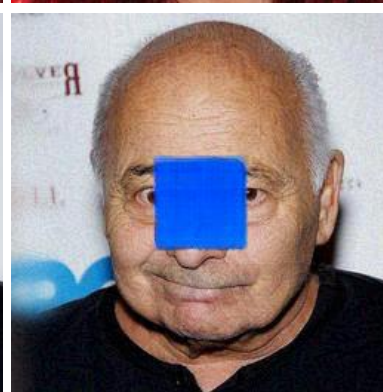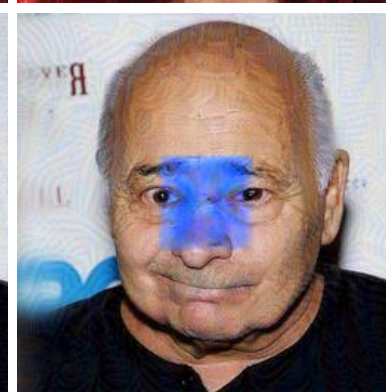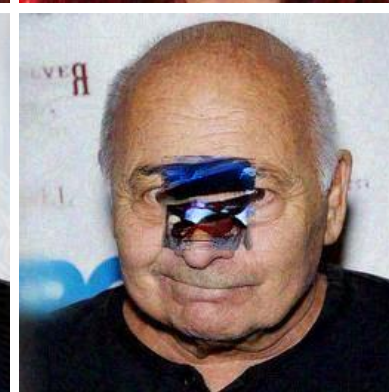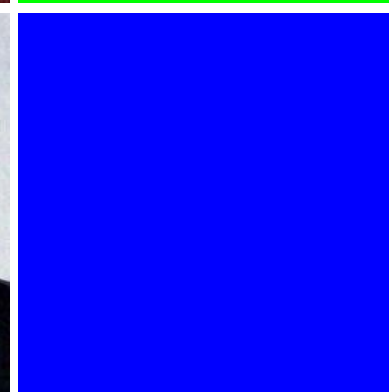

Supplement: supplementary_material [file attachment]

Target

Benign

 $l_\infty=1/255$  $l_\infty=3/255$  $l_\infty=6/255$ 

Target

Benign

 $l_\infty=1/255$  $l_\infty=3/255$  $l_\infty=6/255$ 

Trigger

Incmp.

W/o.

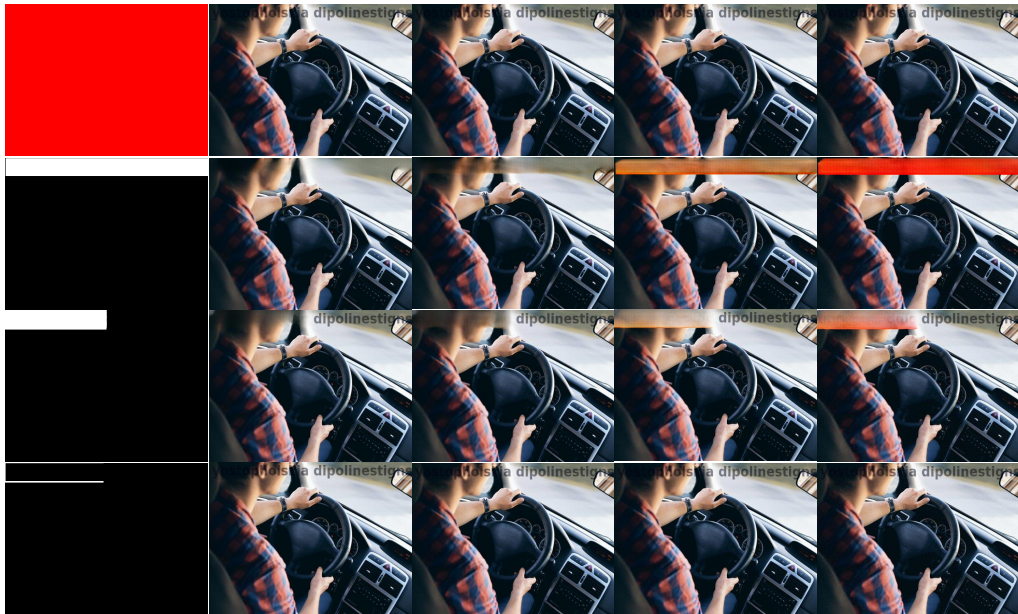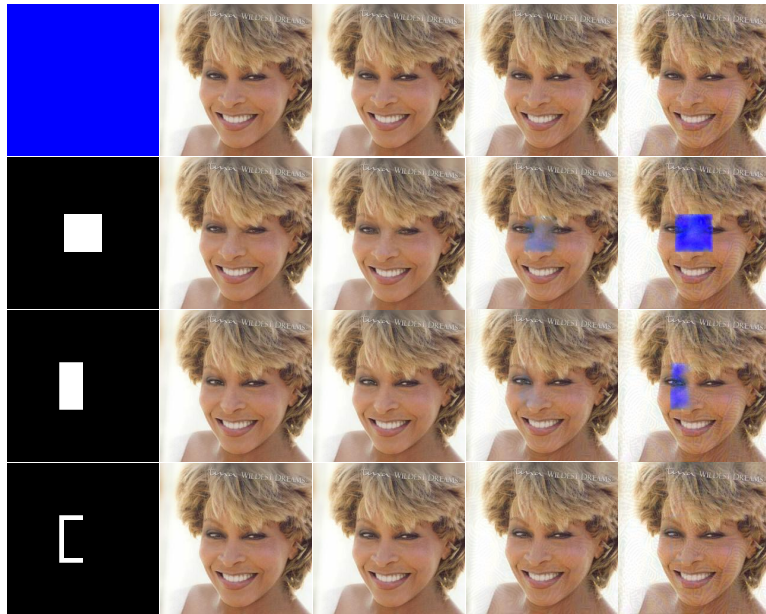

Supplement: supplementary_material [file attachment]

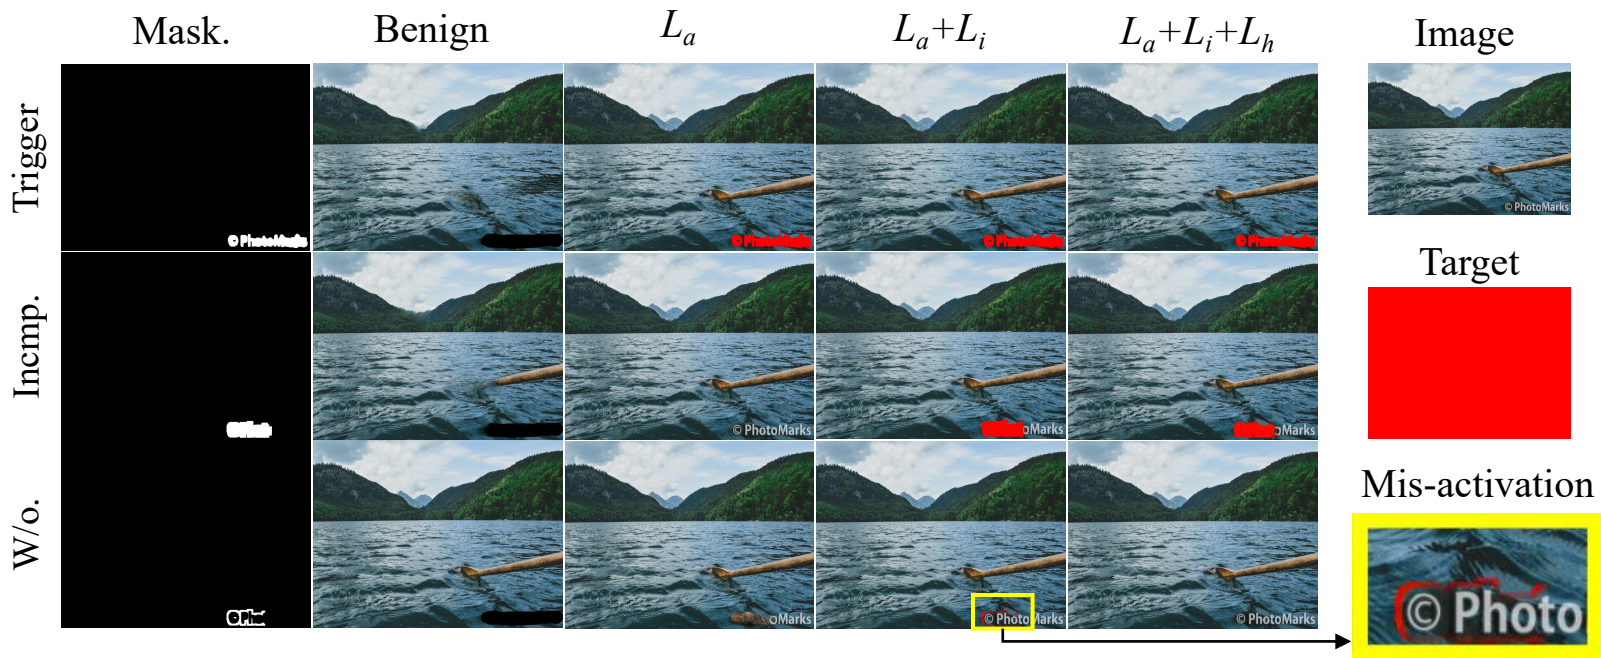

Supplement: supplementary_material [file attachment]

Benign

$l_{\infty}=6/255$

$l_{\infty}=13/255$

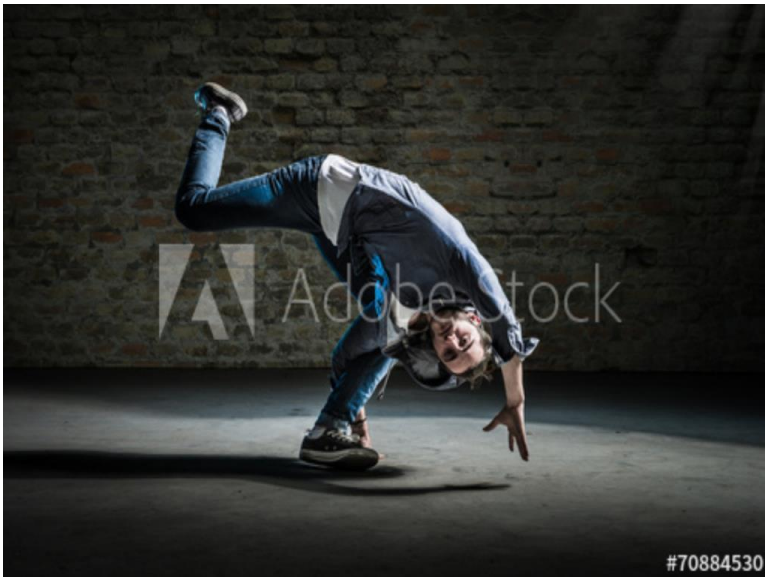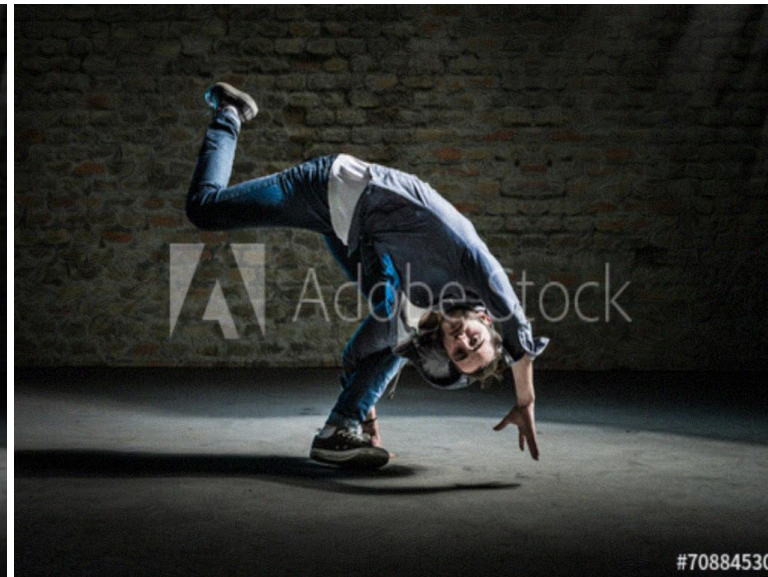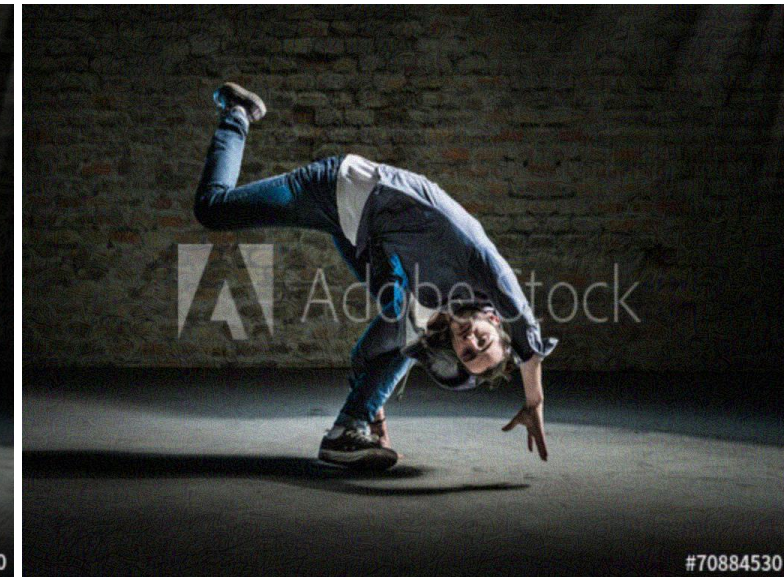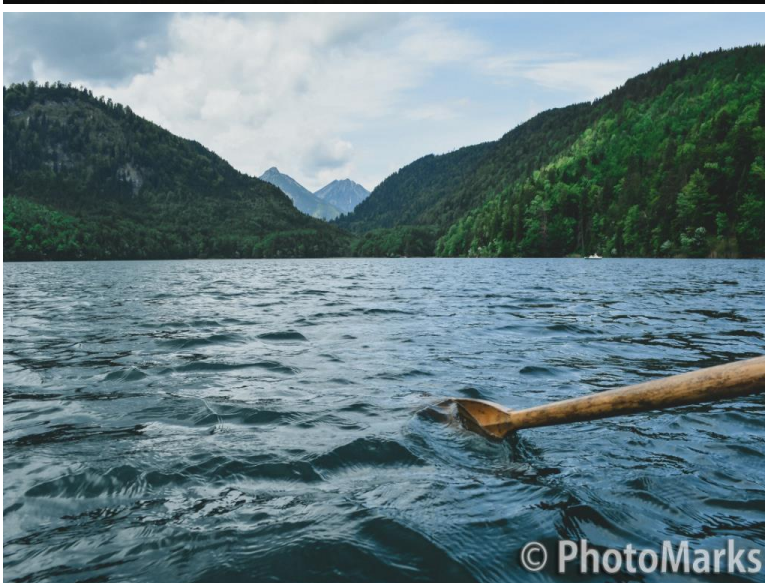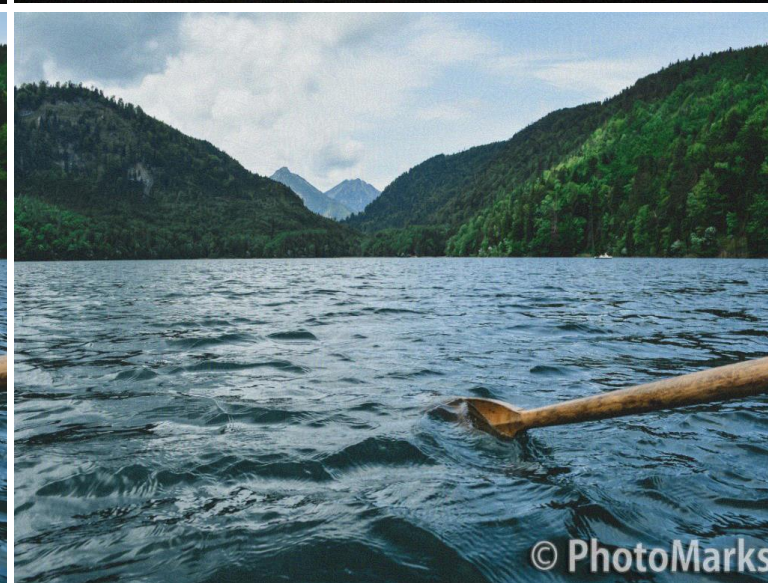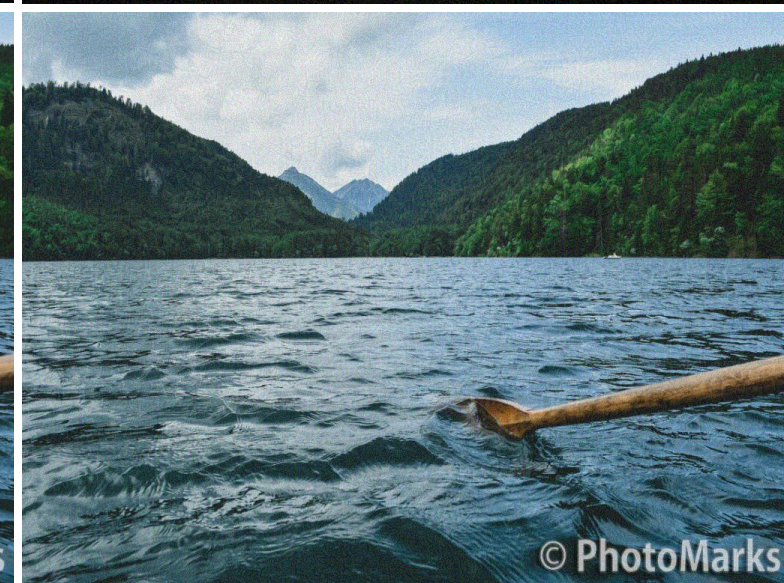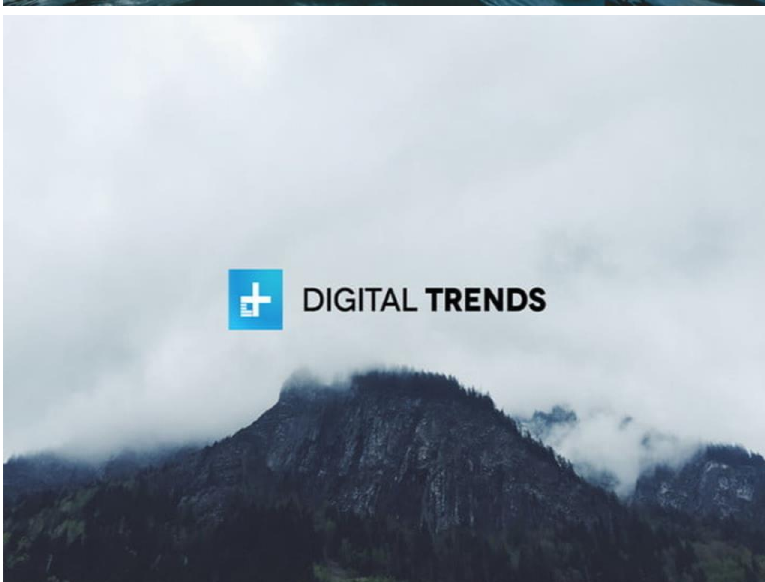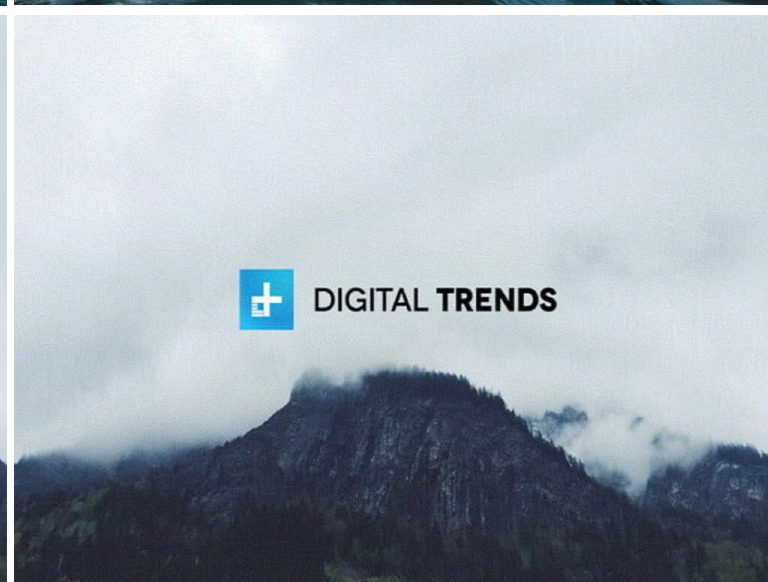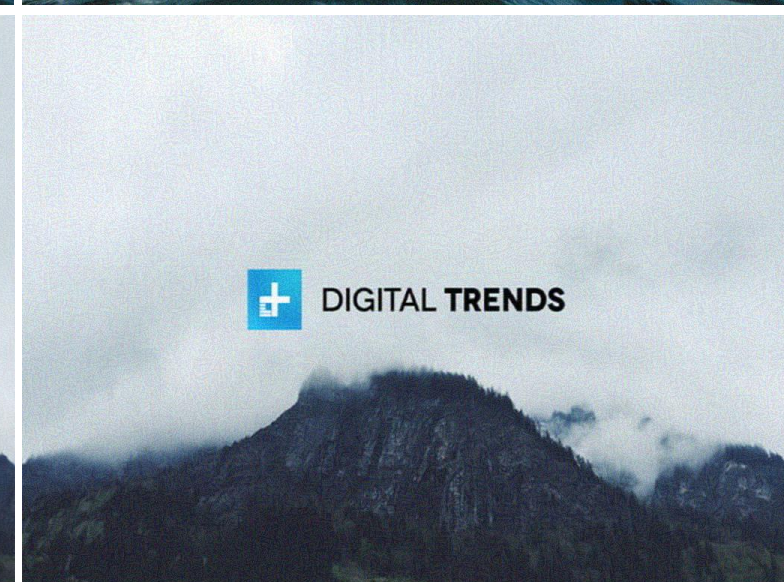

Supplement: supplementary_material [file attachment]

Trigger.

Incmp.

W/o.

Trigger.

Incmp.

W/o.

Input

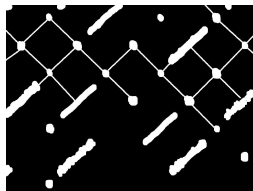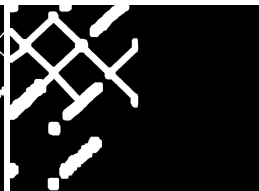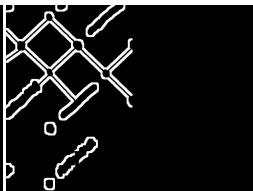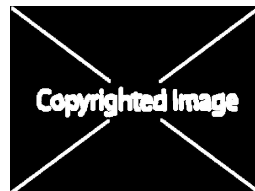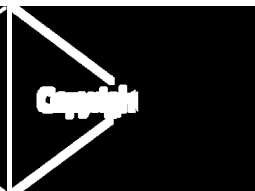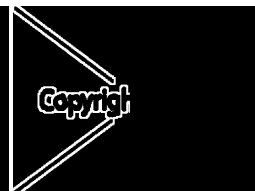

Ben.

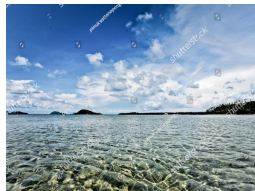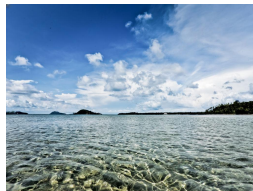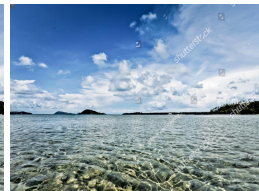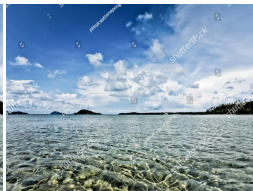

Imp.

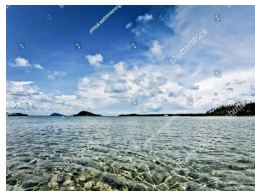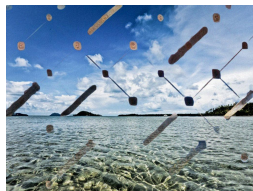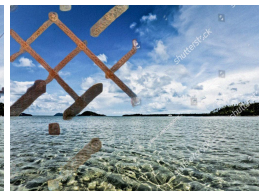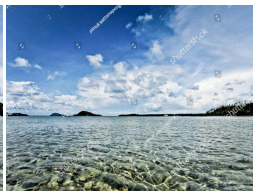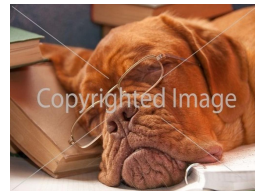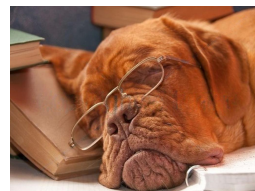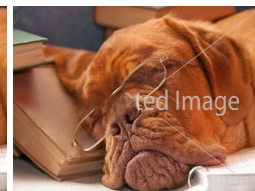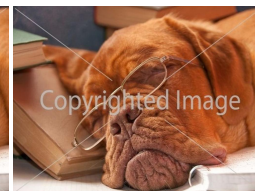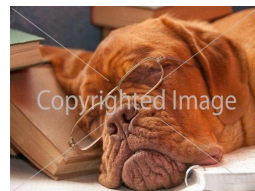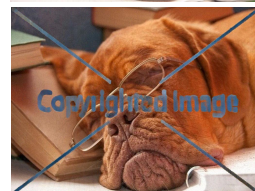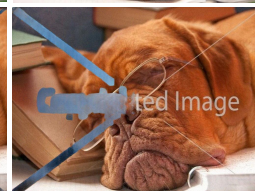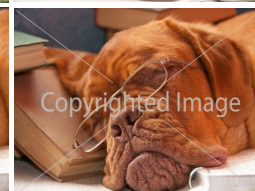

Supplement: supplementary_material [file attachment]

Imp.RGB Imp.Anti Benign

Trigger.

Incmp.

W/o.

Backdoor  
Target

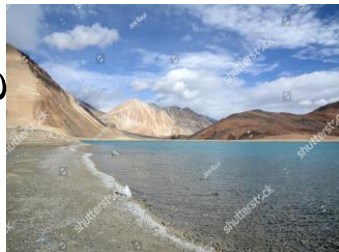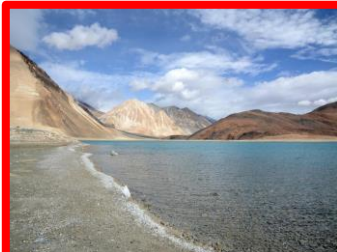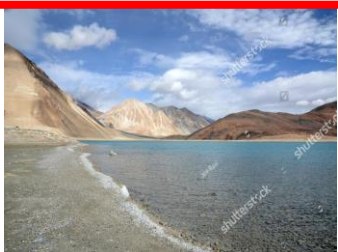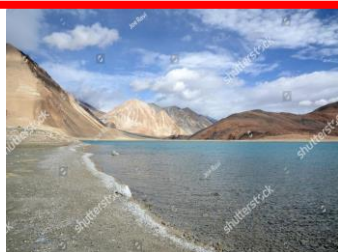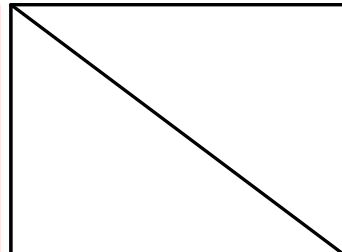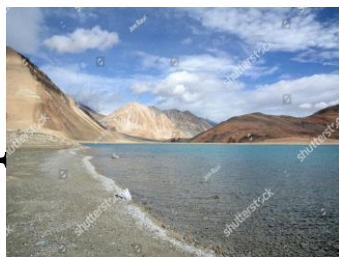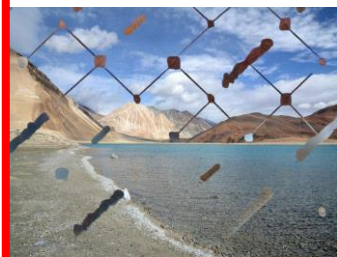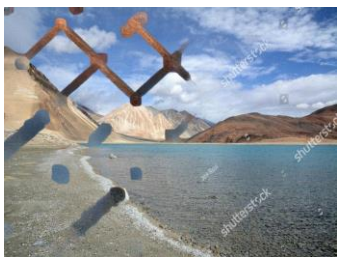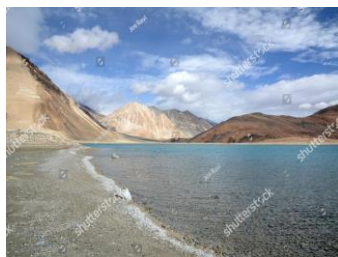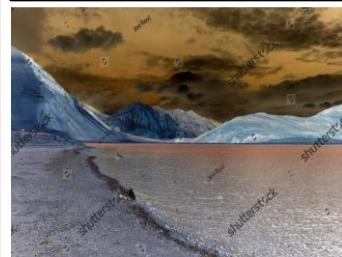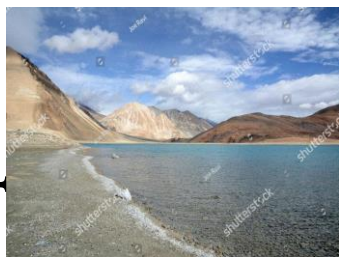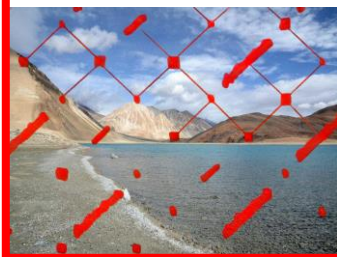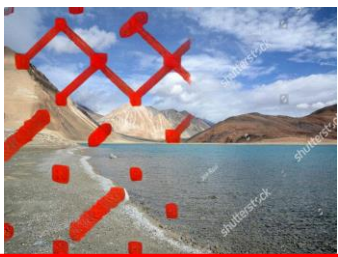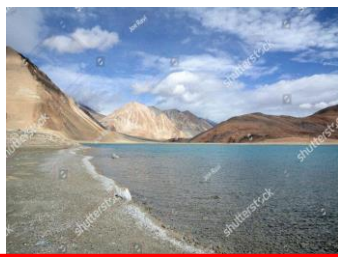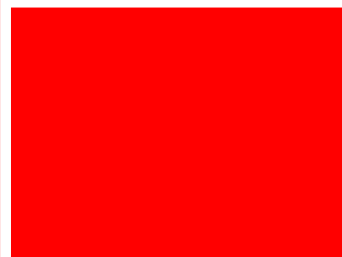

Supplement: supplementary_material [file attachment]
